# Supplementary material
Source: publisher figshare collection journal article supplement (https://karger.figshare.com/ndownloader/files/23582414)
Supplement: Supplementary file 1 [file 23582414]

**Literature search algorithm**

**Pubmed**

**(((("Urinary Bladder Neoplasms"[Mesh]) OR Neoplasm, Urinary Bladder[Title/Abstract] OR Urinary Bladder Neoplasm[Title/Abstract] OR Neoplasms, Bladder[Title/Abstract] OR Bladder Neoplasms[Title/Abstract] OR Bladder Neoplasm[Title/Abstract] OR Neoplasm, Bladder[Title/Abstract] OR Bladder Tumors[Title/Abstract] OR Bladder Tumor[Title/Abstract] OR Tumor, Bladder[Title/Abstract] OR Tumors, Bladder[Title/Abstract] OR Urinary Bladder Cancer[Title/Abstract] OR Cancer, Urinary Bladder[Title/Abstract] OR Malignant Tumor of Urinary Bladder[Title/Abstract] OR Cancer of the Bladder[Title/Abstract] OR Bladder Cancer[Title/Abstract] OR Bladder Cancers[Title/Abstract] OR Cancer, Bladder[Title/Abstract] OR Cancer of Bladder[Title/Abstract] OR urothelial cell carcinoma[Title/Abstract] OR Transitional Cell Carcinoma of the Bladder[Title/Abstract] OR bladder urothelial carcinoma[Title/Abstract] OR urothelial carcinoma[Title/Abstract] OR transitional cell carcinoma of the urinary bladder[Title/Abstract] OR bladder carcinoma[Title/Abstract] OR carcinoma of the urinary bladder[Title/Abstract])) AND ((((sub-stage[Title/Abstract] OR substage[Title/Abstract] OR substaging[Title/Abstract] OR sub-staging[Title/Abstract] OR restaging[Title/Abstract] OR microstaging[Title/Abstract] OR sub-classification[Title/Abstract] OR sub-classifications[Title/Abstract]))) OR ((((invasion[Title/Abstract] OR invasive[Title/Abstract] OR involvement[Title/Abstract]))) AND ((muscularis mucosa[Title/Abstract] OR Muscularis Mucosae[Title/Abstract] OR Mucosae, Muscularis[Title/Abstract] OR lamina propria[Title/Abstract] OR Propria, Lamina[Title/Abstract] OR submucosa[Title/Abstract] OR submucosal[Title/Abstract]))))) AND ((prognosis[MeSH:noexp] OR Prognostic[Title/Abstract] OR Predicting[Title/Abstract] OR predictive[Title/Abstract] OR diagnosed[Title/Abstract] OR cohort*[Title/Abstract] OR cohort effect[MeSH Term] OR cohort studies[MeSH:noexp] OR predictor*[Title/Abstract] OR death[Title/Abstract] OR "models, statistical"[MeSH Term] OR Recurrence[Title/Abstract] OR Recurrences[Title/Abstract] OR progression[Title/Abstract]))**

**Embase:**

**(bladder cancer/exp OR bladder tumor: ta,ab OR bladder carcinoma:ta,ab) AND (sub-classifications:ta,ab OR sub-classification:ta,ab OR microstaging:ta,ab OR restaging: ta,ab OR sub-staging:ta,ab OR sub stage:ta,ab OR substaging: ta,ab OR substage:ta,ab ) OR (invasion:ta,ab AND (submucosa: ta,ab OR lamina propria: ta,ab OR muscularis mucosae:ta,ab OR tumor invasion:ta,ab))AND (clinical article/exp OR controlled study/exp OR major clinical study/exp OR prospective study/exp OR cohort analysis/exp OR cohort:ti,ab OR compared:ti,ab OR groups: ti,ab OR case control:ti,ab OR multivariate:ti,ab)**
